# Supplementary material for: CD28-mediated linear and parallel costimulatory signaling cooperatively regulate CAR-T cell functions via CAR-CD28 microclusters
Source: Research Square preprint supplement (doi:10.21203/rs.3.rs-5443061/v1), 2025-03-20
Supplement: Supplementary file 1 [file 4c14d8b0f6221e8f56f4a200.pdf]

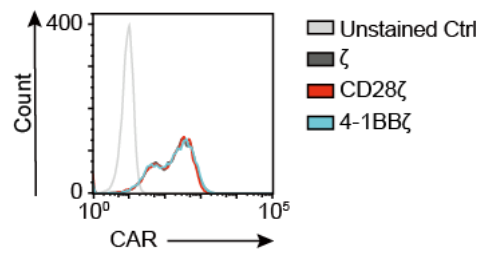

1

## 2 **Supplementary Fig. 1**

3 Primary CD8<sup>+</sup> T cells were transduced with  $\zeta$ . and CD28 $\zeta$ . and 4-1BB $\zeta$ .CAR. Cell surface  
4 expression of CAR was analyzed by flow cytometry.

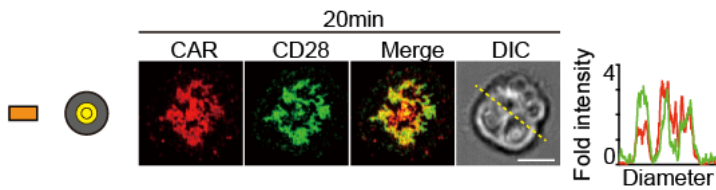

5

6 **Supplementary Fig. 2**

7 The other distribution pattern of CAR and CD28 at the T cell–SLB interface imaged in  
8 the same condition as in **Fig. 3c** (see also **Fig. 3e**). The histogram shows fold fluorescent  
9 intensities of CAR and CD28 on the diagonal yellow lines in the DIC images. Bars, 5  $\mu\text{m}$ .

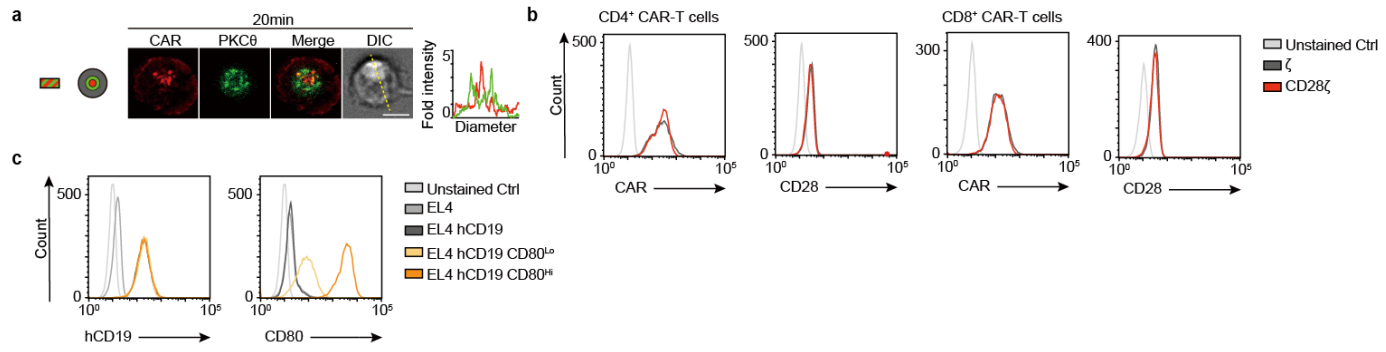

### Supplementary Fig. 3

**a** The other distribution pattern of CAR and PKCθ at the T cell-SLB interface imaged in the same condition as in **Fig. 4c** (see also **Fig. 4e**). The histogram shows fold fluorescent intensities of CAR and PKCθ on the diagonal yellow lines in the DIC images. Bars, 5 μm.

**b** Splenic CD4<sup>+</sup> or CD8<sup>+</sup> T cells were transduced with ζ. or CD28ζ.CAR and analyzed by flow cytometry for cell surface expression of each CAR and CD28.

**c** EL-4 cells were transduced with hCD19 and/or CD80 and sorted by different expression level of CD80: low (CD80<sup>Lo</sup>) and high (CD80<sup>Hi</sup>). The cell surface expression of hCD19 and CD80 were analyzed by flow cytometry.

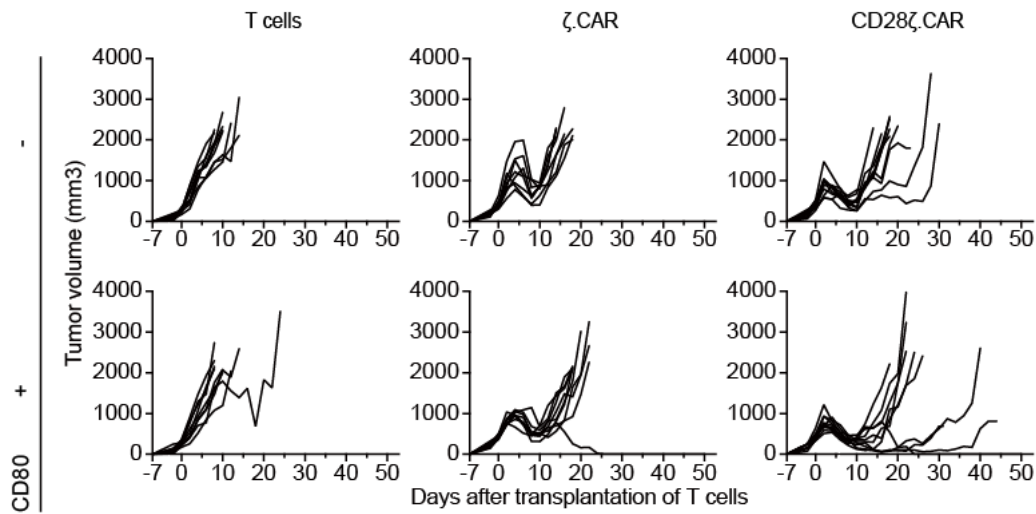

**Supplementary Fig. 4**

The graphs show the individual growth curves of EL-4 cells inoculated into the mice in Fig. 5b.
